# Supplementary material for: Achieving traceless ablation of solid tumors without recurrence by mild photothermal-chemotherapy of triple stimuli-responsive polymer–drug conjugate nanoparticles
Source: Royal Society of Chemistry journal article supplement (doi:10.1039/c8tb02432d), 2018-12-07
Supplement: c8tb02432d1.pdf [file c8tb02432d1.pdf]

## Supporting Information

### Achieving Traceless Ablation of Solid Tumor without Recurrence by Mild Photothermal-Chemotherapy of Dual Stimuli-Responsive Polymer-Drug Conjugate Nanoparticle

Chang Du<sup>1</sup>, Yue Ding<sup>1</sup>, Jiwen Qian<sup>1</sup>, Rong Zhang<sup>2</sup>, Chang-Ming Dong<sup>1,2,\*</sup>

<sup>1</sup>School of Chemistry and Chemical Engineering, Shanghai Key Laboratory of Electrical Insulation and Thermal Aging, Shanghai Jiao Tong University, Shanghai 200240, P. R. China

<sup>2</sup>Joint Research Center for Precision Medicine, Shanghai Jiao Tong University Affiliated Sixth People's Hospital South Campus, Shanghai Fengxian Central Hospital, Shanghai 201400, P. R. China

\*E-mail address: [cmdong@sjtu.edu.cn](mailto:cmdong@sjtu.edu.cn) (C. M. Dong)

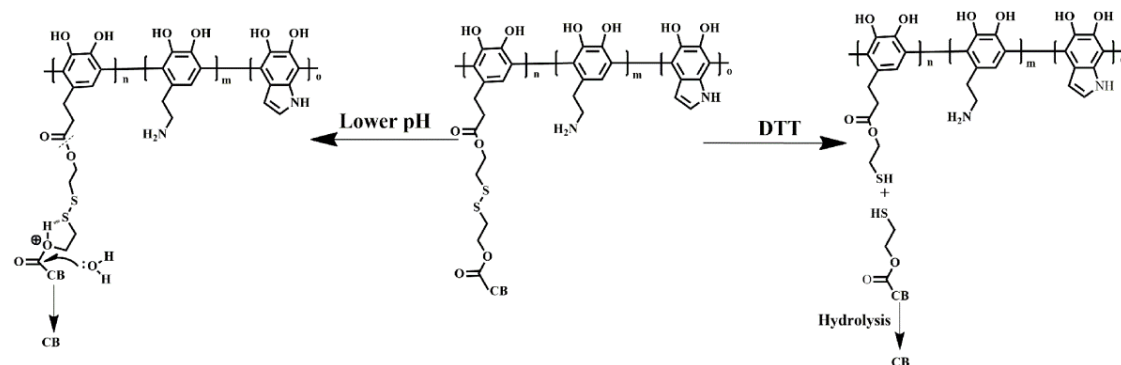

**Scheme S1.** The postulated mechanism for the pH and GSH cleavable drug release from the polyprodrug type PDCBs in PBS at 37°C.

**Table S1.** Synthesis and Characterization of the PDCB<sub>s</sub> nanoparticles with different CB weight percentages.

| Entry <sup>a</sup> | Tris (mg) | DA (mg) | DA-CB (mg) | CB (wt%) | Diameter (nm) | $\Delta T$ (°C)    |                    |
|--------------------|-----------|---------|------------|----------|---------------|--------------------|--------------------|
|                    |           |         |            |          |               | 2w/cm <sup>2</sup> | 1w/cm <sup>2</sup> |
| 1 <sup>b</sup>     | 410       | 12.5    | 13.8       | 25       | 27±1          | 18.0               | ND                 |
| 2                  | 410       | 20.0    | 27.8       | 30       | 124±1         | 30.0               | 13.9               |
| 3                  | 410       | 12.5    | 27.8       | 35       | 134±5         | 23.4               | ND                 |
| 4                  | 410       | 12.5    | 53.6       | 40       | 154±1         | 24.0               | 12.8               |
| 5                  | 410       | 2       | 40         | 45       | 131±7         | 11.4               | ND                 |

a: all samples were dispersed in PBS; b: sample 1 was repeated for 3 times.

**Table S2.** Quantitative analysis of PDCB<sub>s</sub>.

| % Mass Percentage | PDCB <sub>30</sub> | PDCB <sub>40</sub> | DA    | DA-DOX |
|-------------------|--------------------|--------------------|-------|--------|
| O 1s              | 15.72              | 13.71              | 20.92 | 11.95  |
| C 1s              | 69.59              | 65.45              | 69.93 | 63.35  |
| N 1s              | 3.61               | 2.86               | 9.15  | 2.32   |
| S 2p              | 4.83               | 8.84               | 0     | 10.61  |
| Cl 2p             | 6.25               | 9.14               | 0     | 11.77  |

X = DA,  $M_{DA} = 153$ ; Y = DA-CB,  $M_{DA-CB} = 603$ ;  $20.92 X + 11.95 Y = 15.72$ ,  $X+Y=1$  (PDCB<sub>30</sub>);  $20.92 X + 11.95 Y = 20.92$ ,  $X+Y=1$  (PDCB<sub>40</sub>). Based on the above equation, the weight ( $Y \times 303/603$ ) percentage of CB within PDCB<sub>s</sub> can be calculated accordingly.

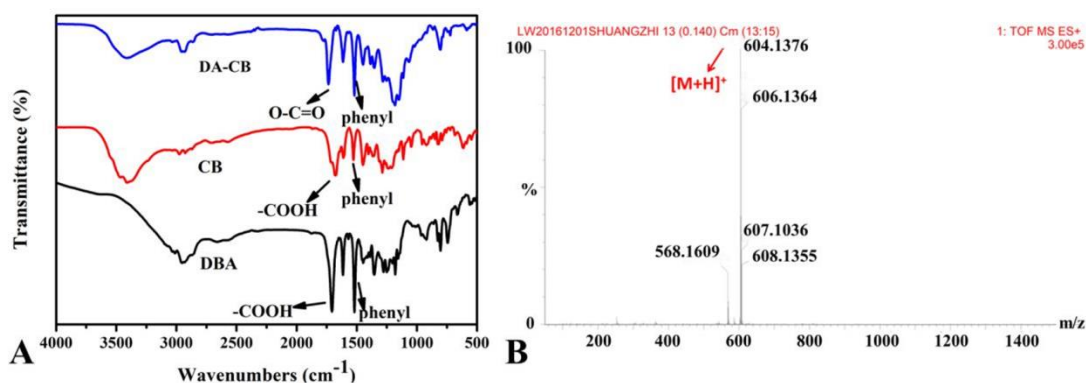

**Figure S1.** FT-IR spectroscopy (A) and TOF-MS (B) of the DA-CB prodrug.

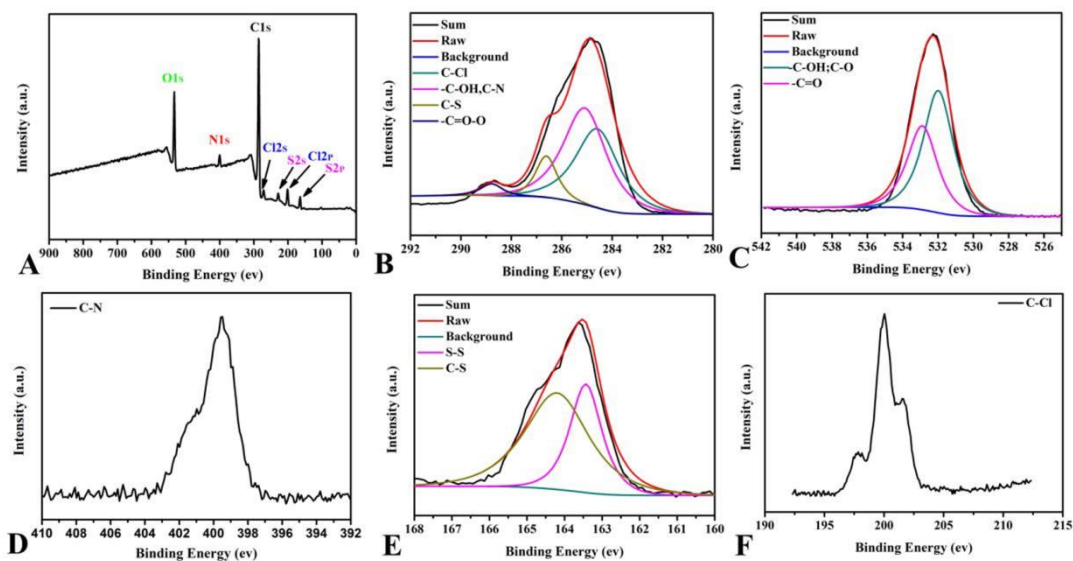

**Figure S2.** XPS spectrum (A), and all related spectra of C1s, O1s, N1s, S2s, S2p, Cl2s and Cl2p of PDCB<sub>30</sub>.

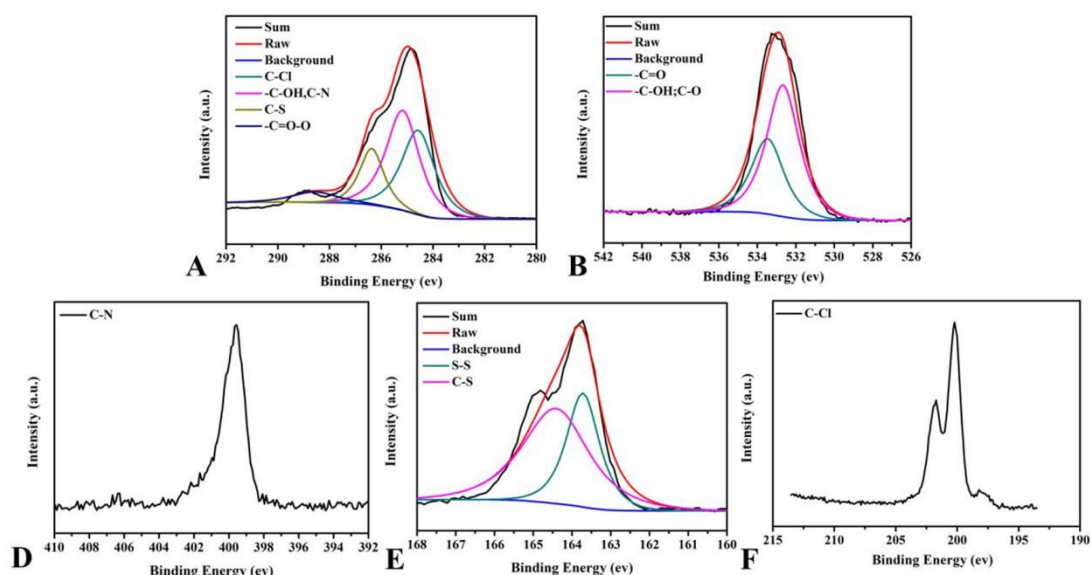

**Figure S3.** XPS spectra for all C1s, O1s, N1s, S2s, S2p, Cl2s and Cl2p of PDCB<sub>40</sub>.

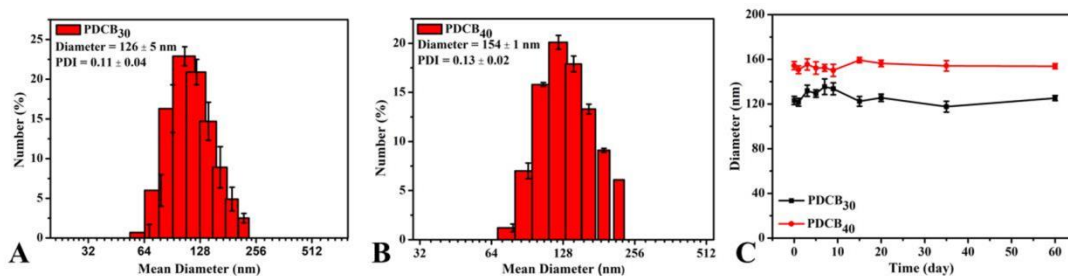

**Figure S4.** The average size of PDCBs determined by DLS at 25 °C (A, B) and the dependence of the nanoparticle size on incubation time in PBS at 4°C (C) for PDCBs. Data are presented as means  $\pm$  SD (n = 5)

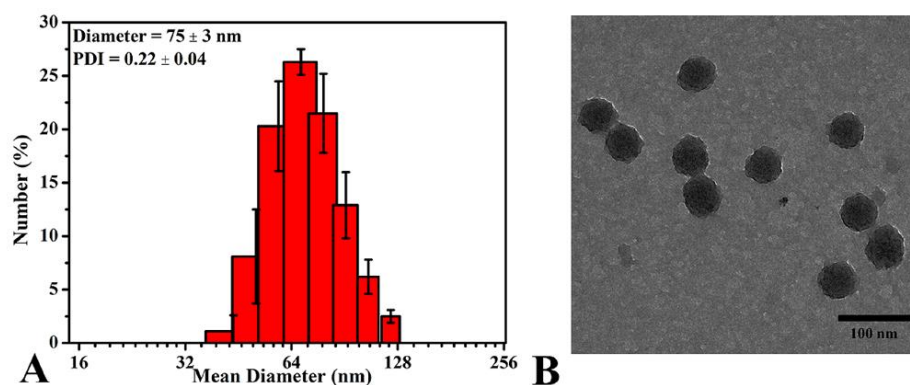

**Figure S5.** The average size of PDA determined by DLS at 25 °C (A) and the morphology by TEM (B). Data are presented as means  $\pm$  SD (n = 5).

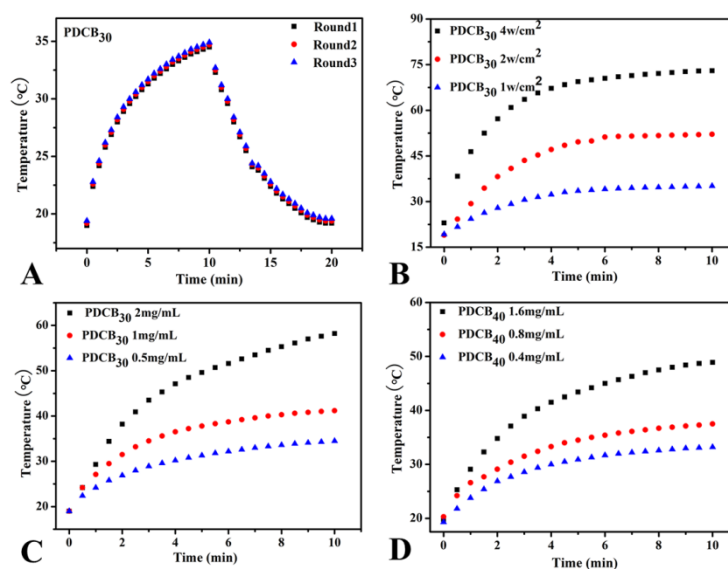

**Figure S6.** The temperature change curves of the PDCB<sub>30</sub> solution (0.5 mg/mL) during repeated laser on/off cycles(A); Heating curves of the PDCB<sub>30</sub> nanoparticle solution (0.5 mg/mL) as a function of irradiation time upon the NIR irradiation (808 nm, 1 W/cm<sup>2</sup>, 10 min) with different power intensities (PDCB<sub>30</sub>, B) or at different concentrations (C, D).

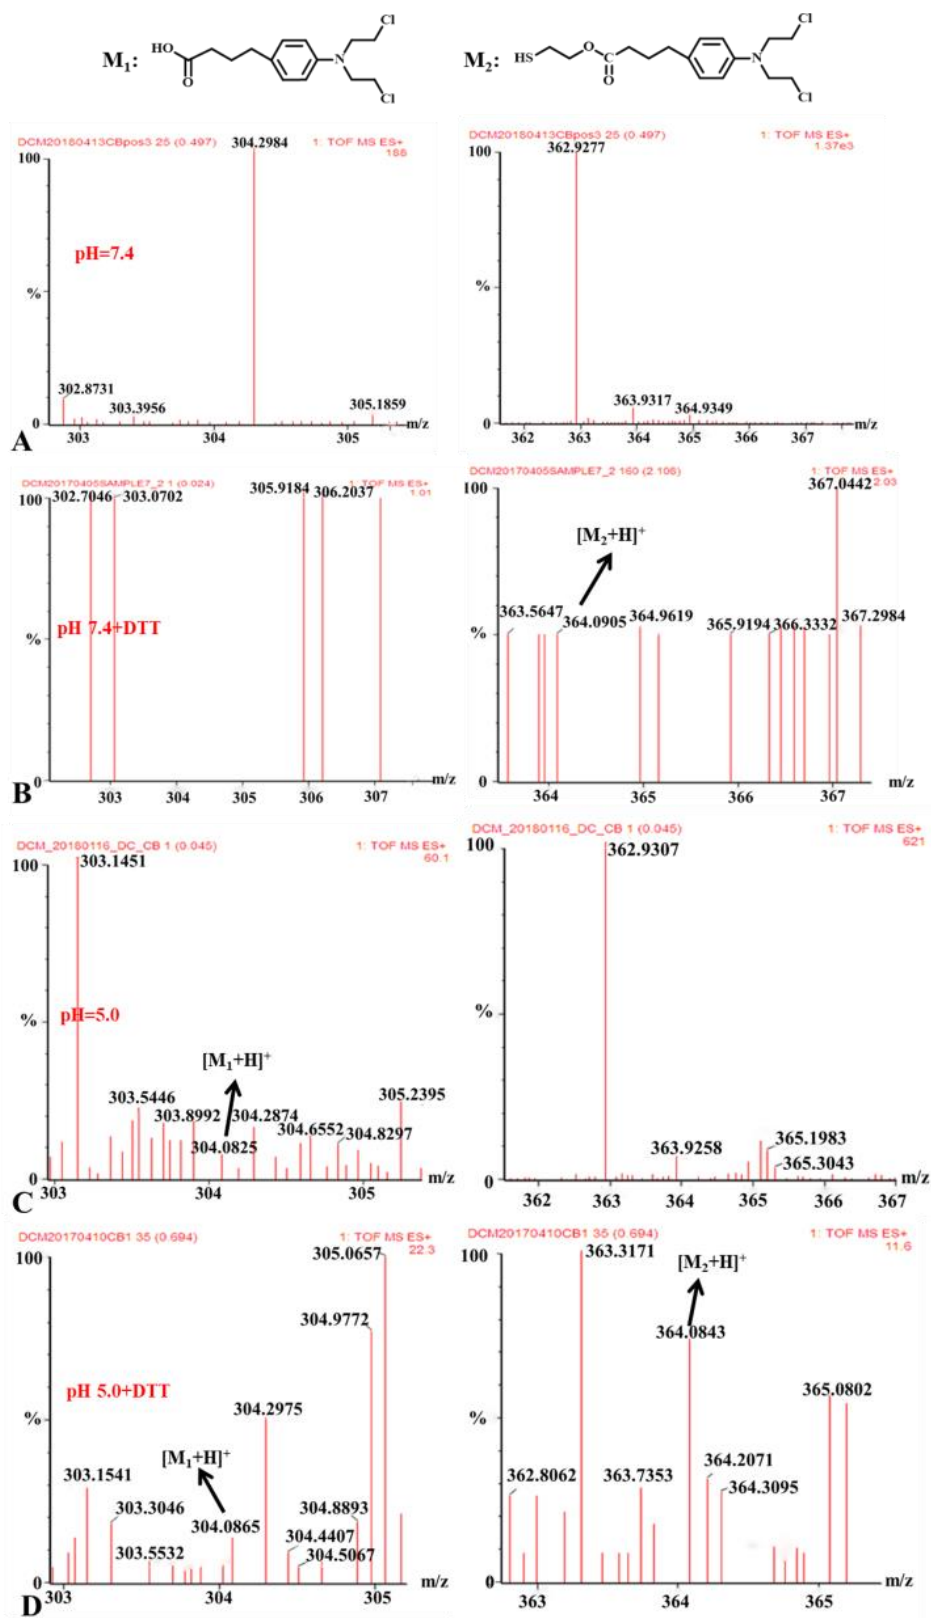

**Figure S7.** The TOF-MS spectra of the released drug from PDCB<sub>40</sub> at pH 7.4 (A), pH 7.4 + 10 mM DTT (B), pH 5.0 (C), and pH 5.0 + 10 mM DTT (D).

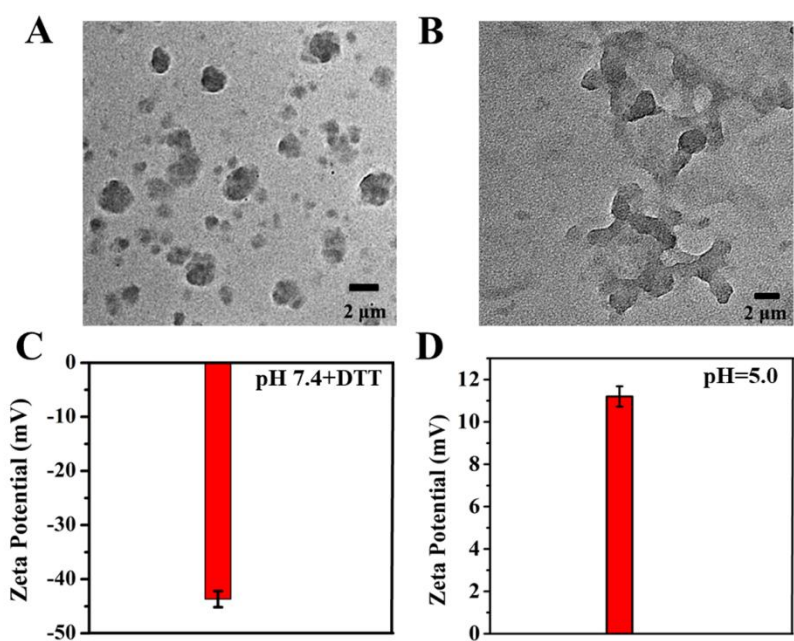

**Figure S8.** TEM (A, B) and zeta potential (C, D) results for PDCB<sub>40</sub> incubated at 37 °C and at pH 7.4 + 10 mM DTT or pH 5.0. Data are presented as means ± SD (n = 5).

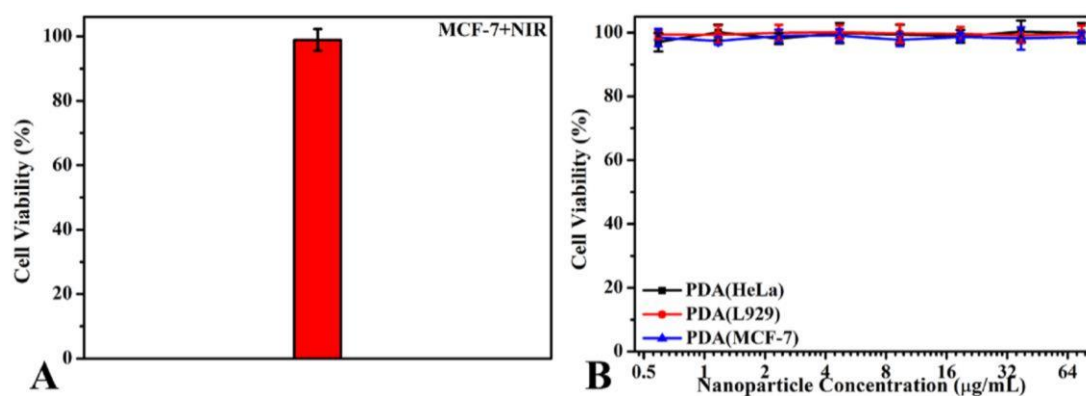

**Figure S9.** The cytotoxicity of NIR (A) and PDA incubated with HeLa, MCF-7 and/or L929 for 48 h (B). All cell viabilities were tested in six replicates (n = 6).

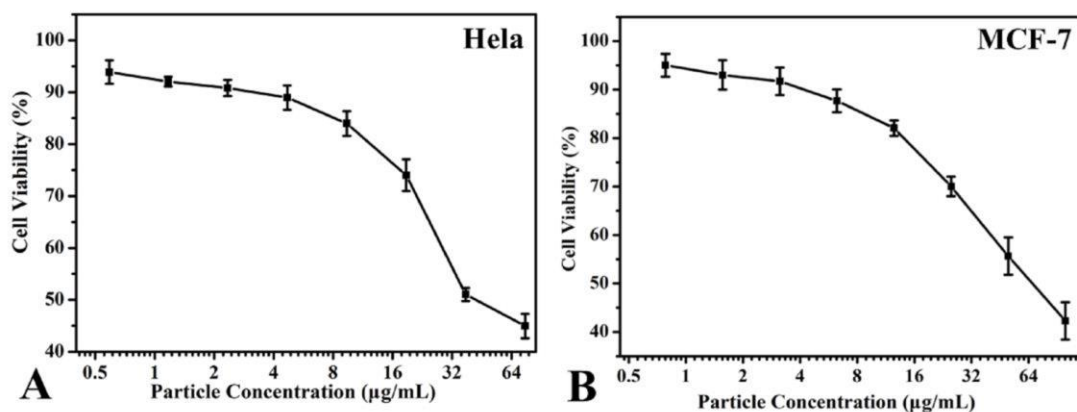

**Figure S10.** Photothermal cytotoxicity of PDA incubated with HeLa (A) or MCF-7 (B) for 4 h, upon the mild NIR irradiation (808 nm, 1 W/cm<sup>2</sup>, 10 min), and then for another 12 h (n = 6).

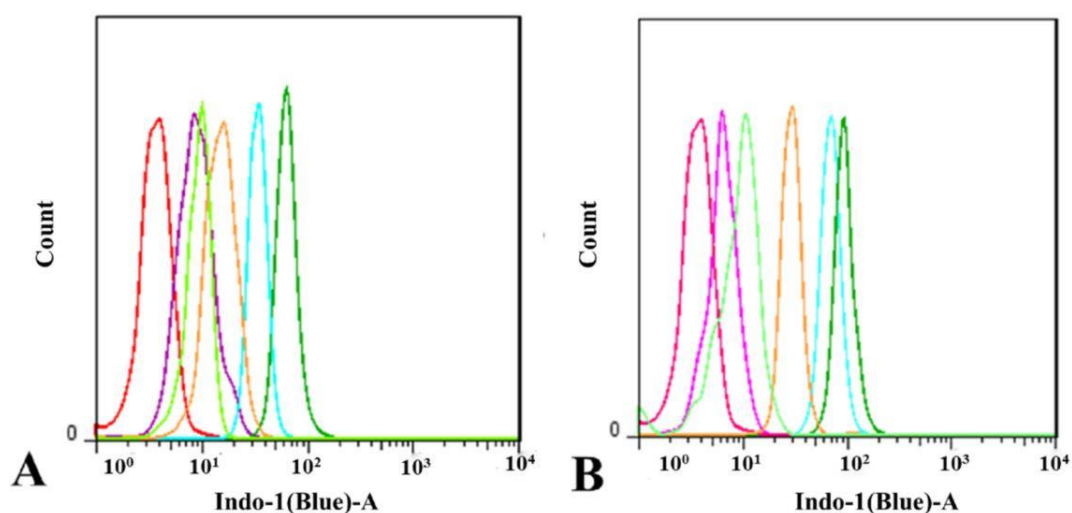

**Figure S11.** Flow cytometry histograms of MCF-7 incubated with CB before (A) and after (B) the mild NIR irradiation for different times (808 nm, 1 W/cm<sup>2</sup>, 10 min; red, control; purple, 15 min; green, 0.5 h; orange, 1 h; blue, 2h; olive, 4 h).

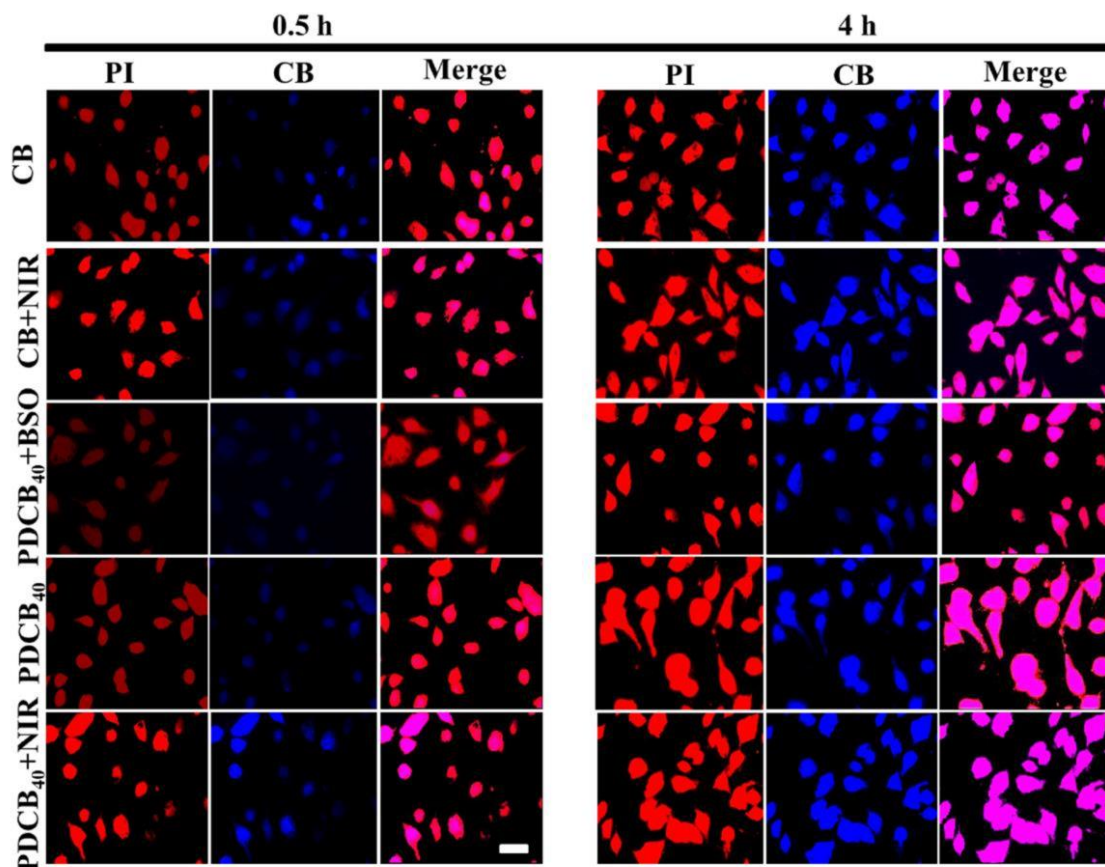

**Figure S12.** Fluorescence microscopy images of the MCF-7 cells incubated with free CB and the PDCB<sub>40</sub> with or without NIR (808 nm, 1 W/cm<sup>2</sup>, 10 min) or with BSO (0.1 mM) at 0.5 h and 4 h. Cell nuclei are stained with PI. The scale bar represents 20 μm.

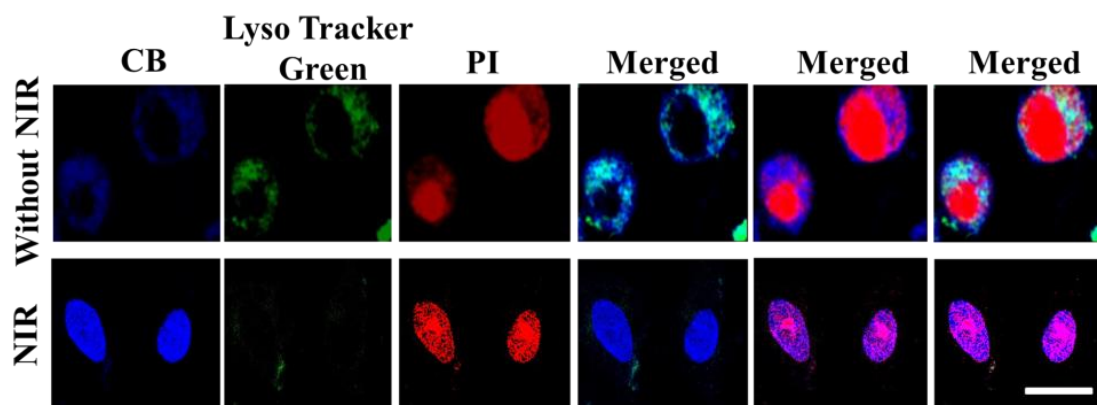

**Figure S13.** CLSM photographs for the intracellular distribution of PDCB<sub>40</sub> incubated with MCF-7 for 2 h with/without the NIR irradiation (808 nm, 1 W/cm<sup>2</sup>, 10 min; LysoTracker for endolysosomes staining, PI for nuclei staining), and the scale bar represents 25 μm.



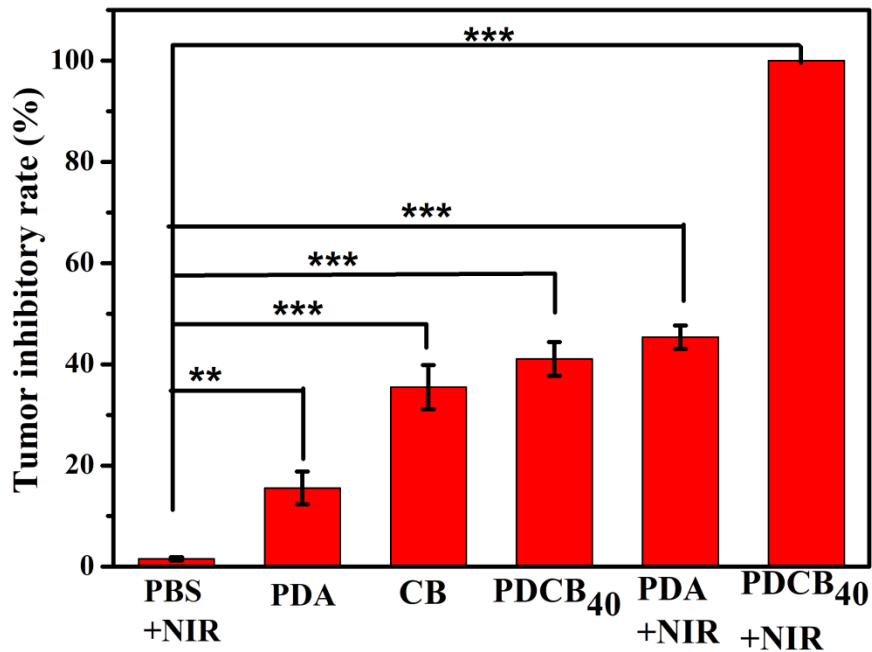

**Figure S14.** Tumor inhibitory rates of the MCF-7 tumors after various treatments compared to the PBS group. The data are shown as mean  $\pm$  SD (n = 4); (\*\*) indicates  $P < 0.005$ , (\*\*\*) indicates  $P < 0.001$ .

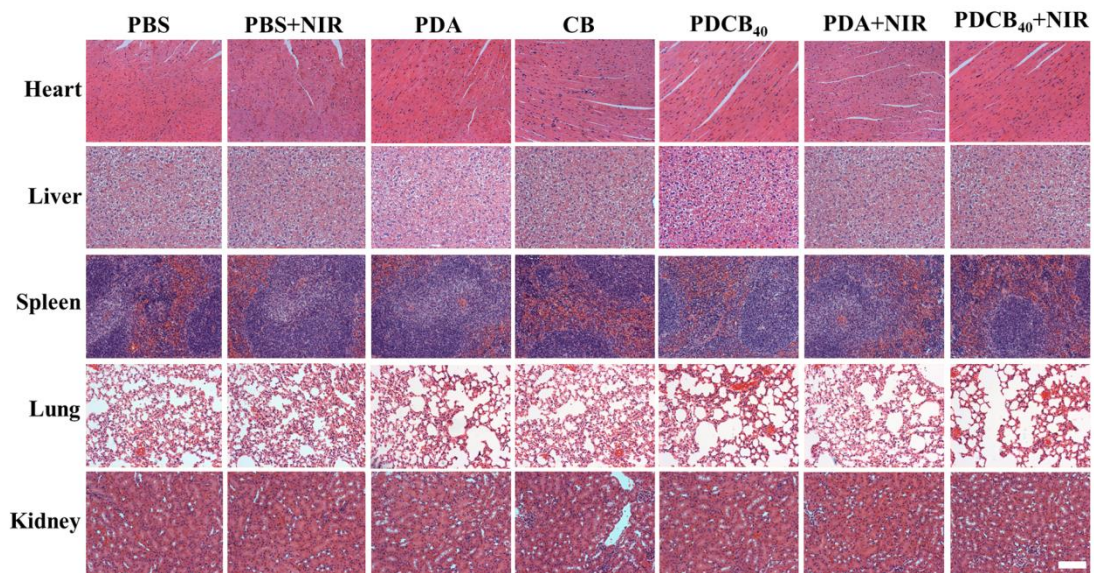

**Figure S15.** HE staining images of the tissue sections from the main organs including liver, kidneys, spleen, lung, and heart from the mice with various treatments, and the scale bar represents 150  $\mu$ m.
